# Supplementary material for: Cell Cycle-dependent Regulation of the Forkhead Transcription Factor FOXK2 by CDK·Cyclin Complexes
Source: PubMed Central journal article supplement — J Biol Chem. 2010 Sep 1;285(46):35728–39. doi: 10.1074/jbc.M110.154005 (PMC2975197; doi:10.1074/jbc.m110.154005), 2010-09-01
Supplement: supp_M110.154005_SupplFigrevised.pdf [file supp_M110.154005_SupplFigrevised.pdf]

## Supplementary data

**Supplementary figure 1. MS/MS spectra of phosphopeptides of FOXK2.** (A) Fragment ions resulting from the triply charged precursor ion of the phosphorylated peptides  $S^{364}APASPNHAGVLSAHSSGAQTPELSR^{390}$  with  $m/z$  899.41. The masses range from  $y_4$  to  $y_{22}$  ions correspond to the non-phosphorylated sequence part 369–390, whereas loss of 98 Da ( $H_3PO_4$ ) from  $y_{23}$  and  $y_{25}$  indicates phosphorylation at position Ser368. (B, C) Fragment ions (B, mass range 100-1300 Da and C, 1400-1820 Da) resulting from the triply charged precursor ion of the phosphorylated peptide  $F^{416}AQSAPGSPLSSQPVLITVQR^{436}$  with  $m/z$  755.05. The evidence for the phosphorylation of Ser423 comes from the mass of the N-terminal  $b_5$  and C-terminal  $y_4$ - $y_{13}$  ions corresponding to the non-phosphorylated sequence and the neutral loss of phosphoric acid (98 Da) from  $y_{14}$  and  $y_{16}$  ions.

**Supplementary movie 1. FOXK2 localisation in the cell cycle.** The movies show time lapse images of live, logarithmically growing HeLa cells inducibly expressing EGFP-FOXK2 over a 24 hour period (see Fig. 2B for example cells at different stages of the cell cycle). (A) Fluorescent imaging of GFP-FOXK2 and (B) brightfield images of the same cells. Note the GFP expressing cell on the far right which divides first.

**A****S368 phosphorylation**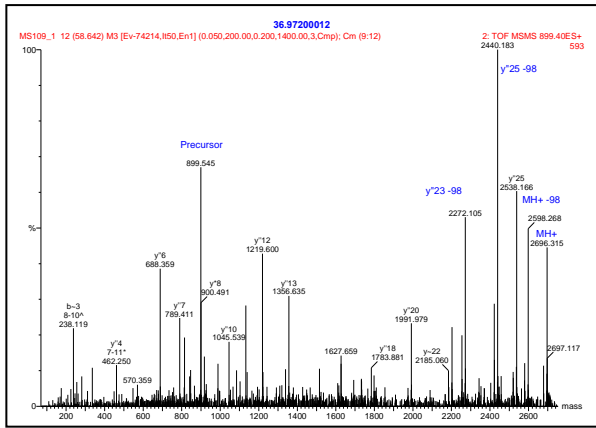364SAPAS<sup>S</sup>PNHAGVLSAHS<sup>S</sup>SAHSSGAQTPESLR<sup>390</sup>**B**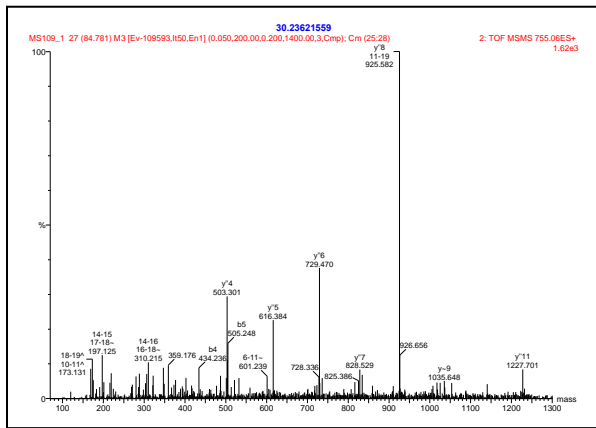416FAQSAPG<sup>S</sup>PLSSQPV<sup>S</sup>LITVQR<sup>436</sup>**C****S423 phosphorylation**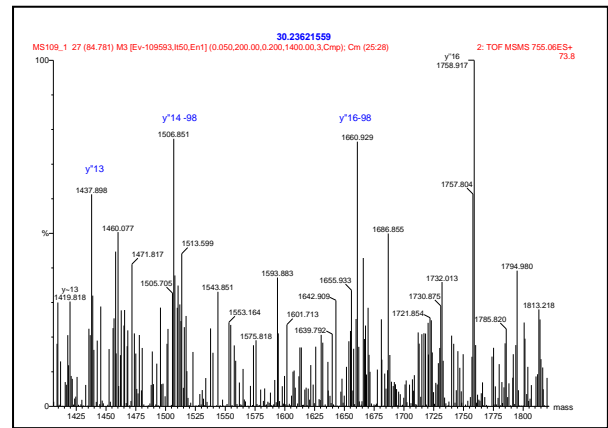**Supplementary Fig. 1**
